# Supplementary material for: DRL1, Encoding A NAC Transcription Factor, Is Involved in Leaf Senescence in Grapevine
Source: PubMed Central journal article supplement (PMC6600502; doi:10.3390/ijms20112678), 2019-05-31
Supplement: ijms-20-02678-s001.pdf [file ijms-20-02678-s001.pdf]

## Supplementary Materials

Fig. S1

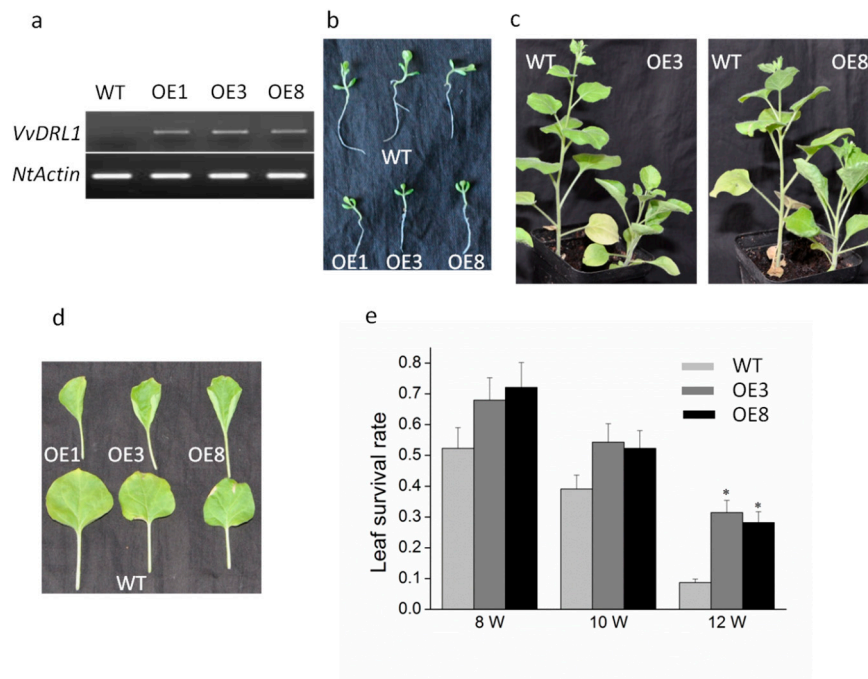

Fig. S1 The phenotype of *DRL1* transgenic tobacco. (a) The expression of *DRL1* in transgenic and WT plants. (b, c) The phenotype of transgenic plants at 1 (b) and 8(c) weeks. (d) The phenotype of leaves from *DRL1* transgenic plants. (e) Leaf survival rate. Bars represent mean  $\pm$  SD. Significant difference from the WT was confirmed by Tukey's test (\*  $P < 0.05$ )

Fig. S2

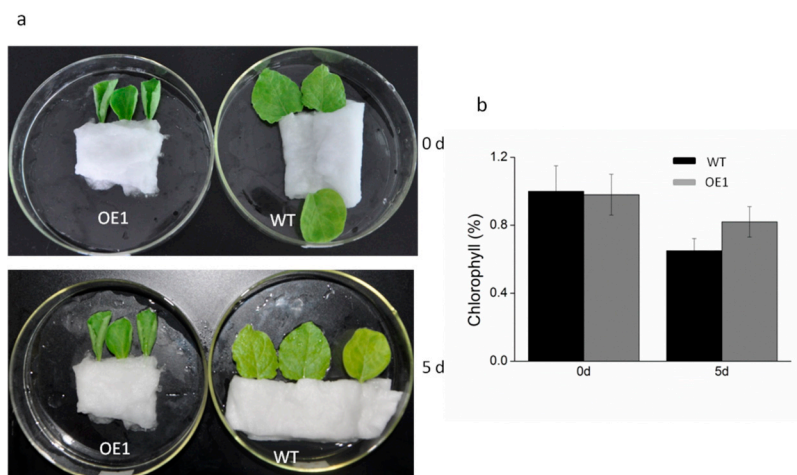

Fig. S2 *DRL1* promotes leaf senescence in tobacco. (a) Detached leaf senescence phenotypes of transgenic tobacco treated with drak for 5d. (b) The determination of chlorophyll concentration. Bars represent mean  $\pm$  SD with at least three biological replicates.

Fig. S3

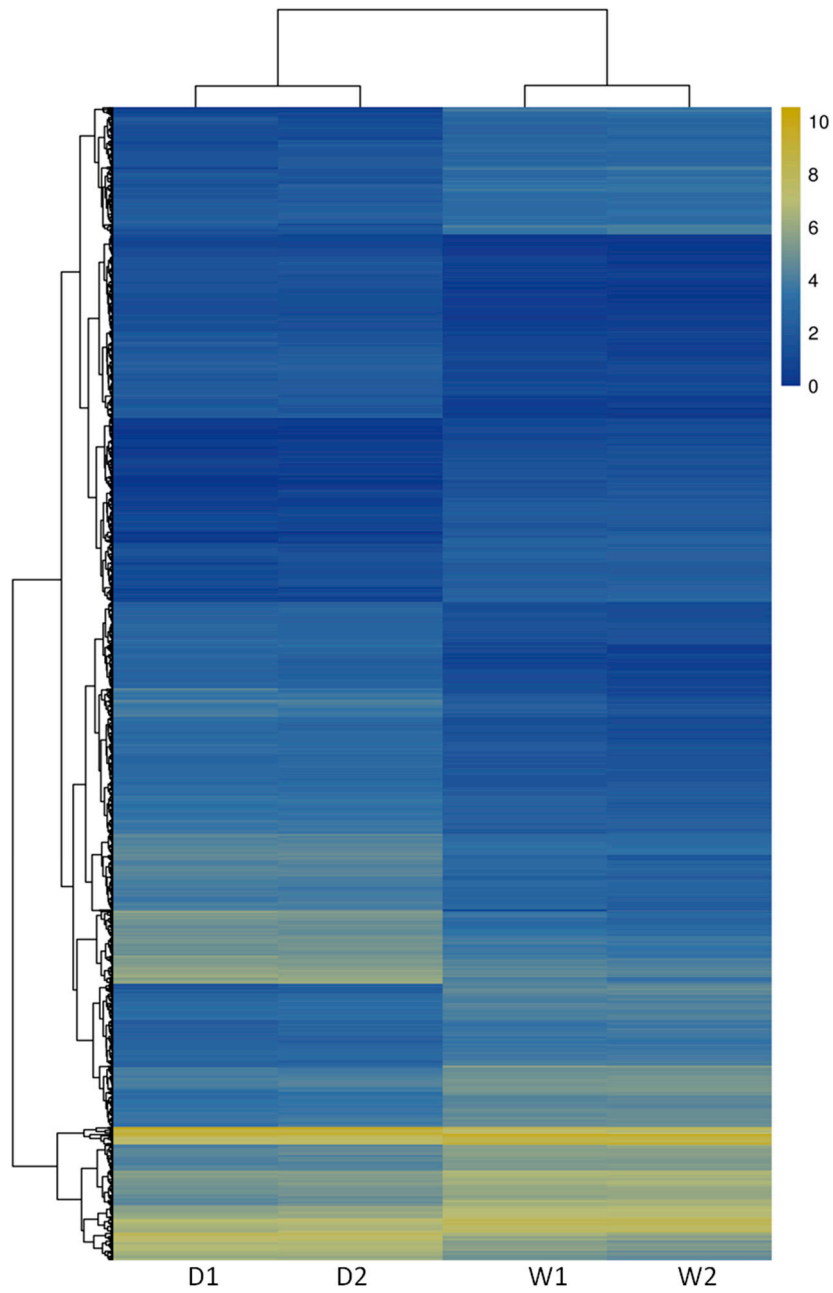

Fig. S3 Heatmap of DEGs in leaves of beased on RNA-seq. The expression levels are quantified as  $\log_2$ . Sampled D1 and D2 were two biological replicates, W1 and W2 were two biological replicates. Among these expressed transcripts, 25381 transcripts showed no significant changes in their expression level ( $\log_2 < 1$ ), while 1149 transcripts were differentially expressed in DRL1 transgenic tobacco ( $\log_2 < 1$ ) at false discovery rate (FDR < 0.001), which includes (50.8%) up-regulated and (49.2%) down-regulated transcripts.

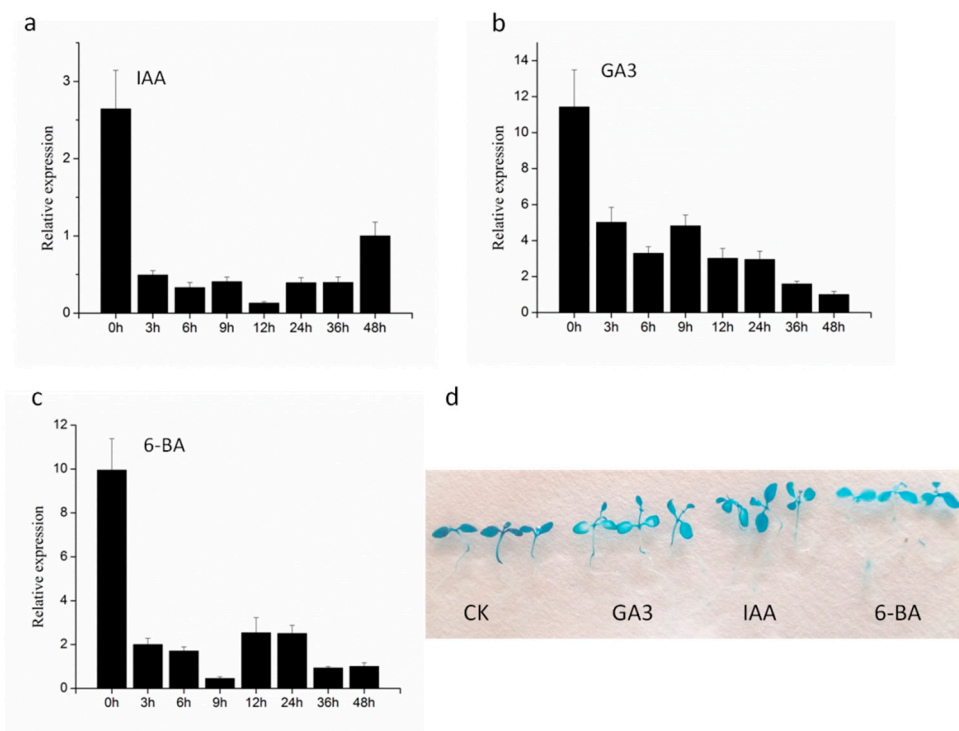

Fig. S4 The expression analysis of *DRL1*. (a) The expression of *DRL1* in grapevine following hormone IAA, GA3 and 6-BA treatment. (b) GUS staining in leaves of  $P_{DRL1}$ -GUS transgenic tobacco plants under ABA treatment. Six-day-old tobacco seedlings were treated (n=60).

Table S1 Number of reads sequenced and mapped to the tobacco genome. The transcriptomic sequencing of cDNA generated from both wild type and *DRL1* transgenic tobacco leaf samples produced 14 and 14.18 million clean reads, respectively, the clean reads of each sample reached 6.78 Gb.

|                               | WT       | <i>DRL1</i> | Sum      |
|-------------------------------|----------|-------------|----------|
| Clean Reads                   | 23360757 | 24109158    | 47469915 |
| Total mapped                  | 17262252 | 17885486    | 35147738 |
| Percent of mapped clean reads | 73.86%   | 74.20%      | 74.03%   |

Table S2 Unigene annotation. In the whole unigene set, a total of 44265 (46.2%) unigenes were significantly matched to known genes in the public databases of NR, NT, Swiss-Prot, KEGG, COG, and GO. (The total unigene number was 95756)

| Annotation Database | Annotated Number | 300<=length<1000 |
|---------------------|------------------|------------------|
| COG Annotation      | 11707            | 3579             |
| GO Annotation       | 21807            | 8150             |
| KEGG Annotation     | 13205            | 4990             |
| KOG Annotation      | 21238            | 7604             |

|                      |       |       |
|----------------------|-------|-------|
| Pfam Annotation      | 24146 | 7757  |
| Swissprot Annotation | 20973 | 7382  |
| eggNOG Annotation    | 37777 | 14211 |
| nr Annotation        | 43602 | 17373 |
| All Annotation       | 44262 | 17539 |

Table S3 DEGs related to hormones.

| ID                       | log2FC   | Regulated | Annotation                                        |
|--------------------------|----------|-----------|---------------------------------------------------|
| <b>IAA related genes</b> |          |           |                                                   |
| c62173                   | 1.678787 | up        | auxin-induced protein 15A-like                    |
| c74273                   | 2.260212 | up        | auxin-induced protein 15-like                     |
| c73867                   | 2.159749 | up        | auxin-induced protein 16-like                     |
| c82466                   | 2.725583 | up        | auxin-responsive protein IAA16                    |
| c75798                   | 2.66065  | up        | auxin-responsive protein IAA16                    |
| c70706                   | 1.782122 | up        | auxin efflux carrier component 1c                 |
| c70976                   | 1.090073 | up        | auxin efflux carrier component 1c                 |
| c48602                   | 1.943798 | up        | premnaspirodiene oxygenase-like                   |
| c62356                   | 1.940161 | up        | xyloglucan endotransglucosylase/hydrolase protein |
| c67577                   | 1.033957 | up        | isoflavone 2'-hydroxylase-like                    |
| c77318                   | 1.192652 | up        | inactive receptor kinase At2g26730                |
| c74045                   | 1.763241 | up        | cytochrome P450 CYP736A12-like                    |
| c66813                   | 2.039682 | up        | cytochrome P450 CYP72A219-like                    |
| c42316                   | -1.10457 | down      | indole-3-acetic acid-induced protein ARG2-like    |
| c72652                   | -1.94887 | down      | 3,9-dihydroxypterocarpan 6A-monooxygenase-like    |
| c75509                   | -1.08972 | down      | auxin-induced protein 6B-like                     |
| c31554                   | -1.96442 | down      | auxin-induced protein 15A-like                    |
| c66540                   | -1.26499 | down      | auxin-induced protein 6B-like                     |
| c81771                   | -2.02658 | down      | auxin-responsive protein IAA29-like               |
| c81858                   | -2.03041 | down      | auxin-induced protein 15A-like                    |
| c81270                   | -1.15669 | down      | cytochrome P450 CYP736A12-like                    |
| c67966                   | -3.28212 | down      | cytochrome P450 86B1-like                         |
| c77102                   | -1.11054 | down      | cytochrome P450 78A3-like                         |
| c81976                   | -1.98908 | down      | cytochrome P450 714A1-like                        |
| c12113                   | -3.32038 | down      | cytochrome P450 93A3-like                         |
| c75878                   | -1.03252 | down      | cytochrome P450 90A1                              |
| c38135                   | -1.40632 | down      | cytochrome P450 78A6-like                         |
| c76819                   | -1.38977 | down      | cytochrome P450 734A1-like                        |
| c48010                   | -1.52565 | down      | cytochrome P450 704C1-like                        |
| c76093                   | -1.21193 | down      | cytochrome P450 CYP72A219-like                    |
| c81697                   | -1.88398 | down      | cytochrome P450 78A3-like                         |
| c69215                   | -1.13064 | down      | cytochrome P450 78A5-like                         |

**GA related genes**

|        |          |      |                                                |
|--------|----------|------|------------------------------------------------|
| c25557 | 3.545966 | up   | gibberellin-regulated protein 11-like          |
| c63722 | 2.632892 | up   | Gibberellin regulated protein 12               |
| c64833 | -3.53212 | down | gibberellin 2-beta-dioxygenase-like            |
| c6507  | -2.88767 | down | gibberellin 2-beta-dioxygenase 2-like          |
| c71394 | -1.52512 | down | gibberellin 2-beta-dioxygenase 1-like          |
| c77228 | -1.33114 | down | gibberellin 2-beta-dioxygenase 3e              |
| c23771 | -1.05842 | down | gibberellin 2-beta-dioxygenase 3               |
| c81696 | -1.75872 | down | 2-oxoglutarate-dependent dioxygenase AOP3-like |

**CTK related genes**

|        |          |      |                                                                               |
|--------|----------|------|-------------------------------------------------------------------------------|
| c12570 | -2.36607 | down | two-component response regulator ARR15                                        |
| c69612 | -1.62696 | down | two-component response regulator ARR9-like                                    |
| c48223 | -1.39363 | down | two-component response regulator ARR9                                         |
| c70750 | -1.70688 | down | cytokinin riboside 5'-monophosphate phosphoribohydrolase LOG1-like isoform X1 |
| c69978 | -1.07816 | down | cytokinin riboside 5'-monophosphate phosphoribohydrolase LOG1-like            |

**ABA related genes**

|        |          |      |                                            |
|--------|----------|------|--------------------------------------------|
| c67931 | 1.048154 | up   | xanthoxin dehydrogenase-like               |
| c55983 | 1.306234 | up   | abscisic stress-ripening protein 2         |
| c72359 | -3.54043 | down | zeaxanthin epoxidase, chloroplastic-like   |
| c81325 | -1.40141 | down | zeaxanthin epoxidase, chloroplastic-like   |
| c77357 | -1.13117 | down | zeaxanthin epoxidase, chloroplastic        |
| c67782 | -3.47452 | down | abscisic acid receptor PYL4-like           |
| c72107 | -2.00208 | down | protein ABSCISIC ACID-INSENSITIVE 5        |
| c44037 | -1.28001 | down | protein FAF-like, chloroplastic            |
| c75239 | -4.64207 | down | abscisic acid 8'-hydroxylase 4-like        |
| c64198 | -3.11972 | down | abscisic acid 8'-hydroxylase 1-like        |
| c25919 | -1.4221  | down | abscisic stress-ripening protein 2         |
| c82400 | -1.37651 | down | abscisic acid inducible protein TAS14-like |

**ET related genes**

|        |          |      |                                                  |
|--------|----------|------|--------------------------------------------------|
| c36806 | 1.916629 | up   | ethylene-responsive transcription factor 2-like  |
| c81731 | 1.689691 | up   | ethylene-responsive transcription factor RAP2    |
| c73789 | -2.56806 | down | 1-aminocyclopropane-1-carboxylate oxidase 1      |
| c45524 | -1.26547 | down | 1-aminocyclopropane-1-carboxylate oxidase 1      |
| c59922 | -1.1586  | down | adenylate isopentenyltransferase 5               |
| c72189 | -4.50739 | down | ethylene-responsive transcription factor ABR1    |
| c68758 | -1.70653 | down | ethylene-responsive transcription factor 1B-like |
| c33523 | -1.41461 | down | Ethylene-responsive transcription factor 2       |
| c69748 | -1.12601 | down | Ethylene-responsive transcription factor 1       |
| c64904 | -1.0153  | down | ethylene response factor,                        |

**SA related genes**

|        |          |      |                                                     |
|--------|----------|------|-----------------------------------------------------|
| c83203 | 1.224551 | up   | syntaxin-121-like                                   |
| c81170 | -1.20669 | down | serine hydroxymethyltransferase, mitochondrial-like |

**JA related genes**

|        |          |      |                                       |
|--------|----------|------|---------------------------------------|
| c68003 | 1.086145 | up   | allene oxide cyclase                  |
| c67550 | 1.013442 | up   | jasmonate ZIM domain protein a        |
| c81486 | 1.494959 | up   | CER6                                  |
| c86852 | -5.65926 | down | coronatine-insensitive protein 1-like |
| c82769 | -2.91773 | down | jasmonic acid 2                       |
| c33700 | -1.49625 | down | jasmonate ZIM domain protein b        |

**SL related genes**

|        |          |    |                                   |
|--------|----------|----|-----------------------------------|
| c76015 | 1.208508 | up | carotenoid cleavage dioxygenase 4 |
|--------|----------|----|-----------------------------------|

---
